# Supplementary material
Source: MDPI journal article supplement (https://www.mdpi.com/2036-7481/14/2/44)

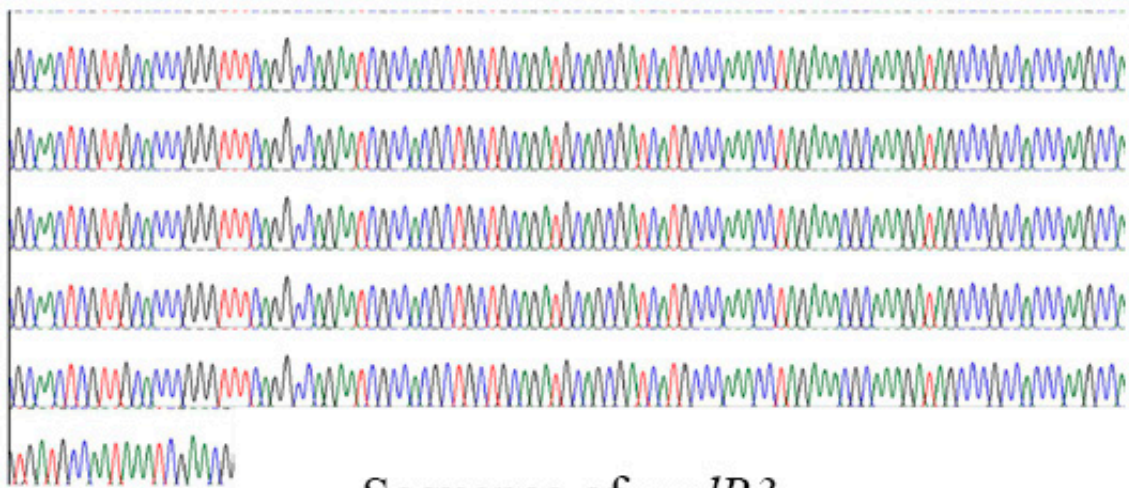

Sequence of *aadB3*

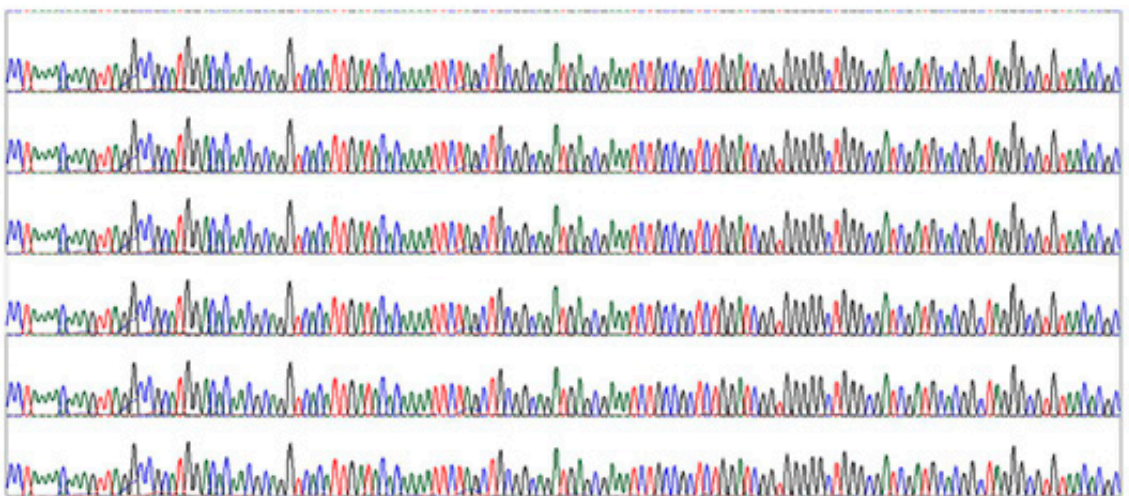

Sequence of *clmA6*

**Figure S1.** Sequencing analysis of *aadB3* and *clmA6*.

Supplement: s1 [file s1]
